# Supplementary material
Source: PubMed Central journal article supplement (PMC5053790)

**Supplemental Figure 1. Temporal differences in incidence of treatment with renal replacement therapy (RRT)<sup>a</sup> between 2000-2004 and 2005-2009.**

(<sup>a</sup> based on enrollment in the United States Renal Data System or having a dialysis procedure code in Medicare or Veterans Affairs administrative files)

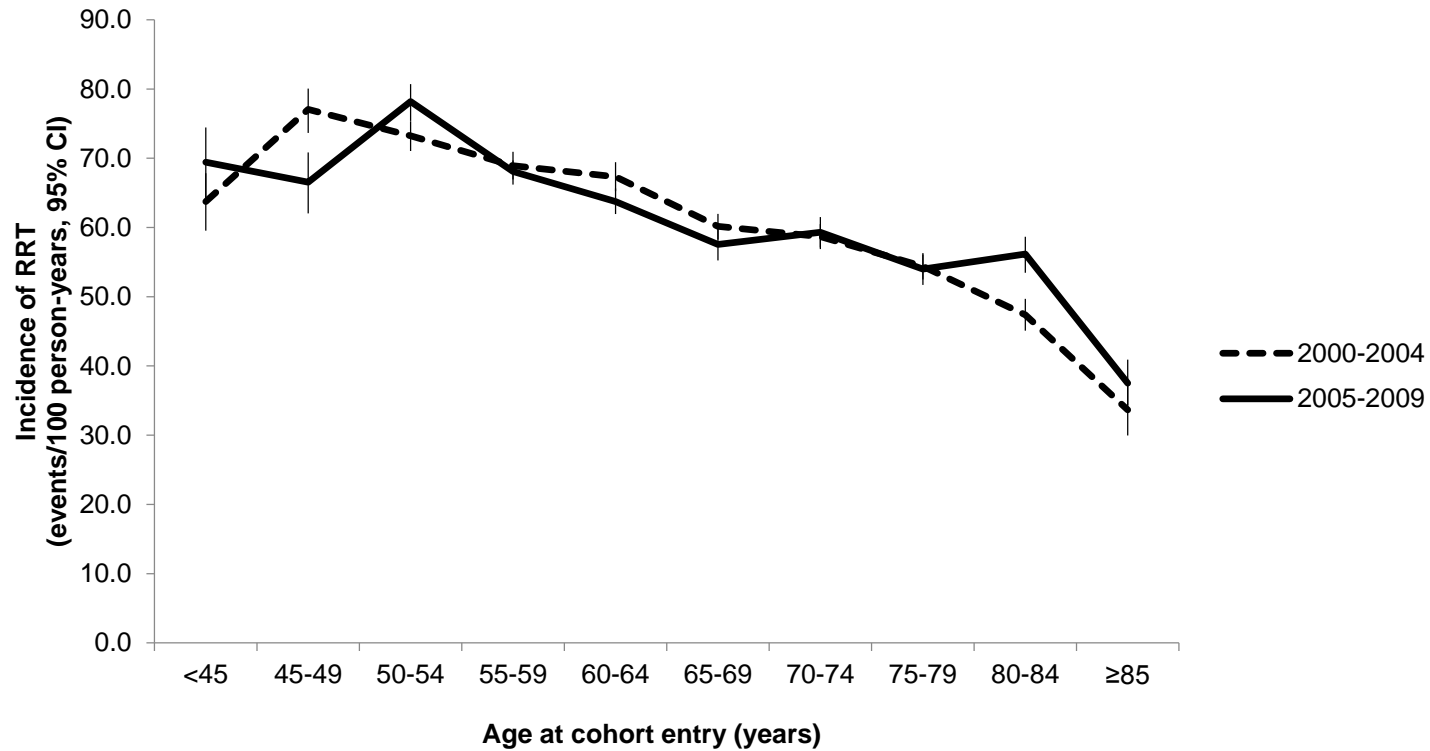

Supplement: CJN.03760416SupplementaryData.pdf [file CJN.03760416SupplementaryData.pdf]
